# Supplementary material
Source: publisher figshare collection journal article supplement (https://acs.figshare.com/ndownloader/files/4341919)
Supplement: Supplementary file 1 [file 4341919]

## Supporting Information

### Sorption of Perfluorochemicals (PFCs) to Granular Activated Carbon (GAC) in the Presence of Ultrasound

Deming Zhao<sup>1,2</sup>, Jie Cheng<sup>1</sup>, Chad D. Vecitis<sup>3</sup>, and Michael R. Hoffmann<sup>1\*</sup>

1. W. M. Keck Laboratory, California Institute of Technology, Pasadena, California 91125
2. College of Chemical Engineering and Materials Science, Zhejiang University of Technology, 310032 Hangzhou, China
3. School of Engineering and Applied Sciences, Harvard University, Cambridge, MA 02138

Submitted to *Journal of Physical Chemistry*

December 2010

## Supporting Tables

**Table S1.** Aqueous composition of landfill groundwater prior to spiking with PFCs for adsorption experiments. Analysis completed by Pace Analytical.

| Landfill Groundwater                    |              |
|-----------------------------------------|--------------|
| pH                                      | 7.3          |
| Temperature (°C)                        | 10-15 °C     |
| PFOA (ppb)                              | 65 ppb       |
| PFOS (ppb)                              | 30 ppb       |
| PFBA (ppb)                              | 7 ppb        |
| dissolved Oxygen                        | 2 mg/L       |
| Ammonia (NH <sub>3</sub> )              | 200-600 µg/L |
| Sulfate (SO <sub>4</sub> <sup>-</sup> ) | 4-30 mg/L    |
| Sulfide (S <sup>2-</sup> )              | 200-500 µg/L |
| Iron <sub>(s)</sub>                     | 30 mg/L      |
| Iron <sub>(aq)</sub>                    | 15-60 mg/L   |
| Mn <sub>(s)</sub>                       | 2 mg/L       |
| Mn <sub>(aq)</sub>                      | 0.5-1.6 mg/L |
| TOC                                     | 5-20 mg/L    |
| Acetone                                 | 7.2 µg/L     |
| Diisopropyl ether                       | 3.5 µg/L     |
| 2-butanone                              | 3.4 µg/L     |
| sec-butyl alcohol                       | 0.9 µg/L     |
| 4-methyl-2-pentanone                    | 0.5 µg/L     |
| toluene                                 | 0.07 µg/L    |
| benzene                                 | 0.03 µg/L    |
